# Supplementary material
Source: Springer Nature journal article supplement (https://www.springermedizin.de/resource/supplementary/12889_2004_154_MOESM1_ESM.pdf/9500434)

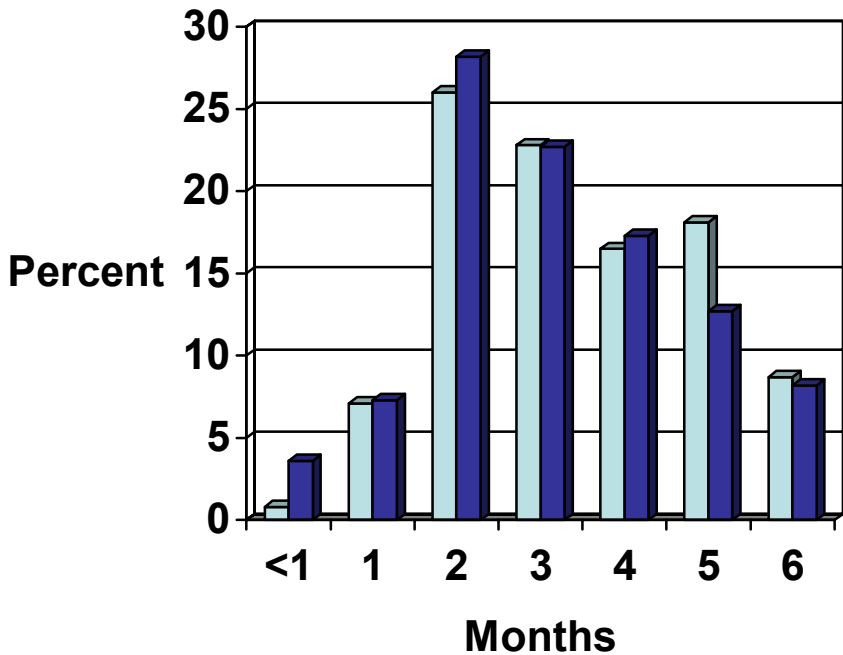

Supplement: MOESM1 [file 9500434]
